# Supplementary material
Source: PubMed Central journal article supplement (PMC5809336)

A

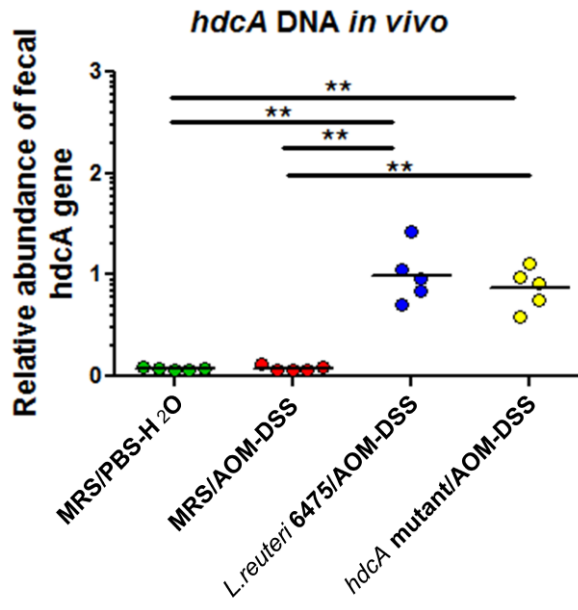

B

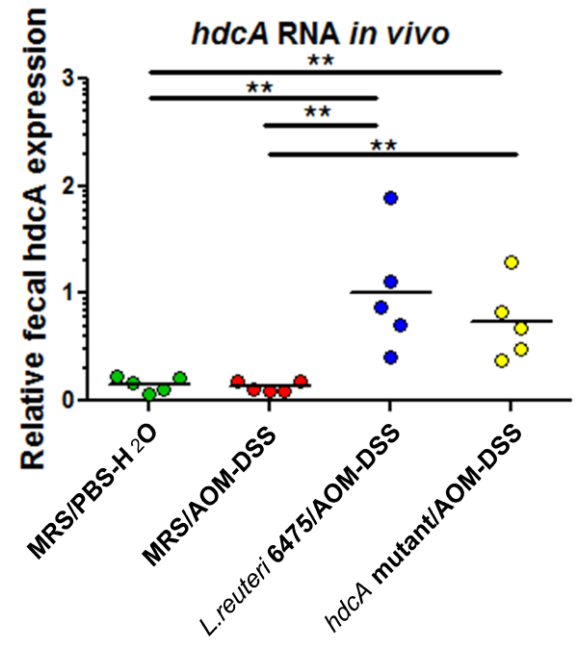

C

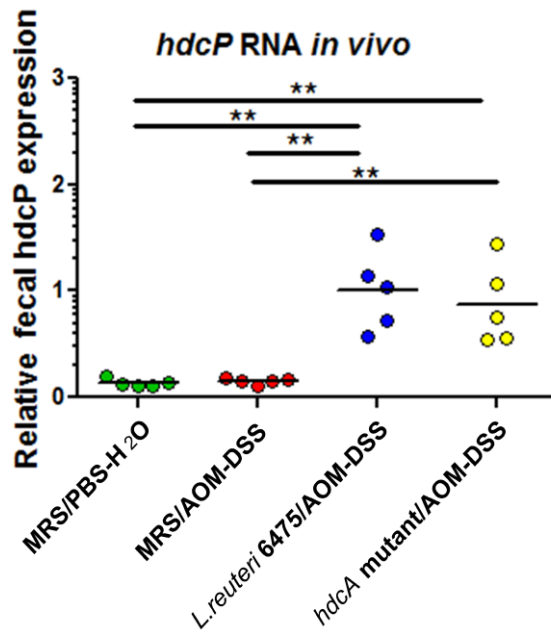

Supplement: mmc5.pdf [file mmc5.pdf]
